# Supplementary material for: Does a mandatory non-medical switch from originator to biosimilar etanercept lead to increase in healthcare use and costs? A Danish register-based study of patients with inflammatory arthritis
Source: PubMed Central journal article supplement — RMD Open. 2019 Aug 12;5(2):e001016. doi: 10.1136/rmdopen-2019-001016 (PMC6691512; doi:10.1136/rmdopen-2019-001016), 2019-08-12
Supplement: rmdopen-2019-001016supp001.pdf [file rmdopen-2019-001016supp001.pdf]

**Supplementary Table 1A.**

Regression analyses estimating whether previous comorbidities have an influence on changes in health utilization

| Previous comorbidity                                               | Number of in-patient admissions |         | Number of days in hospital |         | Number of outpatient visits |         |
|--------------------------------------------------------------------|---------------------------------|---------|----------------------------|---------|-----------------------------|---------|
|                                                                    | Exp (estimate)                  | p-value | Exp (estimate)             | p-value | Exp (estimate)              | p-value |
| Endocrine. nutritional. metabolic disease                          | 1.16 (0.70-1.92)                | 0.575   | 0.47 (0.16-1.38)           | 0.169   | 1.07 (0.97-1.19)            | 0.176   |
| Diseases of circulatory system                                     | 0.96 (0.61-1.52)                | 0.876   | 1.08 (0.48-2.44)           | 0.848   | 0.96 (0.88-1.05)            | 0.356   |
| Diseases of respiratory system                                     | 0.66 (0.35-1.22)                | 0.184   | 0.76 (0.30-1.93)           | 0.570   | 0.90 (0.80-1.00)            | 0.050   |
| Diseases of digestive system                                       | 1.23 (0.74-2.06)                | 0.418   | 1.29 (0.54-3.11)           | 0.565   | 0.97 (0.89-1.06)            | 0.519   |
| Diseases of skin and subcutaneous system                           | 0.82 (0.43-1.54)                | 0.531   | 0.39 (0.11-1.48)           | 0.167   | <b>0.86 (0.77-0.96)</b>     | 0.006   |
| Diseases of musculoskel. system. connective tissue                 | 0.67 (0.12-3.91)                | 0.658   | 0.55 (0.07-4.50)           | 0.573   | 1.09 (0.72-1.65)            | 0.690   |
| Diseases of genitourinary system                                   | 0.81 (0.44-1.48)                | 0.493   | 1.21 (0.41-3.58)           | 0.731   | <b>0.90 (0.82-0.99)</b>     | 0.037   |
| Symptoms. signs and abnormal clinical etc                          | 1.05 (0.66-1.68)                | 0.838   | 1.56 (0.68-3.57)           | 0.294   | 0.87 (0.80-0.95)            | 0.001   |
| Injury. poisoning. consequences of external causes                 | 1.36 (0.87-2.13)                | 0.172   | 2.14 (0.91-5.03)           | 0.081   | 0.97 (0.89-1.06)            | 0.488   |
| Factors influencing health status and contact with health services | 1.10 (0.73-1.65)                | 0.64    | 1.85 (0.87-3.91)           | 0.109   | 0.95 (0.90-1.01)            | 0.088   |

Statistically significant results are marked with bold types

Only previous comorbidities affecting &gt;100 patients are shown

\*Adjusted for gender, age, dead in post period, duration of ETA before index date, stopped SB4 treatment within 180 days and comorbidities.

Comorbidities are defined according to WHO chapters 12-24 months before index date

**Supplementary Table 1B.**

Regression analyses estimating whether previous comorbidities have an influence on changes in health costs\*

| Previous comorbidity                                               | In-patient total costs  |         | Out-patient total costs |         | Primary sector total costs |         | Prescription medical total costs |         | Total costs      |         |
|--------------------------------------------------------------------|-------------------------|---------|-------------------------|---------|----------------------------|---------|----------------------------------|---------|------------------|---------|
|                                                                    | Exp (est.)              | p-value | Exp (est.)              | p-value | Exp (est.)                 | p-value | Exp (est.)                       | p-value | Exp (est.)       | p-value |
| Endocrine, nutritional, metabolic disease                          | 0.98 (0.50-1.93)        | 0.959   | 0.99 (0.88-1.11)        | 0.823   | 0.98 (0.90-1.08)           | 0.731   | 1.01 (0.93-1.10)                 | 0.767   | 0.97 (0.82-1.14) | 0.687   |
| Diseases of circulatory system                                     | 1.22 (0.73-2.02)        | 0.444   | 0.97 (0.88-1.08)        | 0.616   | 1.05 (0.95-1.15)           | 0.319   | 1.00 (0.90-1.11)                 | 0.970   | 0.97 (0.86-1.09) | 0.604   |
| Diseases of respiratory system                                     | 1.53 (0.84-2.77)        | 0.165   | 0.94 (0.80-1.09)        | 0.384   | 0.93 (0.83-1.05)           | 0.260   | 0.97 (0.89-1.06)                 | 0.509   | 1.03 (0.87-1.20) | 0.760   |
| Diseases of digestive system                                       | 1.14 (0.60-2.16)        | 0.696   | 1.11 (0.90-1.36)        | 0.328   | 0.98 (0.89-1.08)           | 0.714   | 1.07 (0.98-1.18)                 | 0.120   | 1.08 (0.89-1.31) | 0.458   |
| Diseases of skin and subcutaneous system                           | 0.59 (0.25-1.40)        | 0.232   | 0.92 (0.82-1.03)        | 0.151   | 1.00 (0.88-1.13)           | 0.955   | 0.96 (0.87-1.07)                 | 0.496   | 0.87 (0.72-1.05) | 0.143   |
| Diseases of musculoskel. system, connective tissue                 | 1.06 (0.14-8.13)        | 0.953   | 0.81 (0.59-1.13)        | 0.218   | 0.82 (0.60-1.11)           | 0.190   | 0.84 (0.60-1.17)                 | 0.309   | 0.81 (0.56-1.17) | 0.260   |
| Diseases of genitourinary system                                   | 1.03 (0.47-2.24)        | 0.940   | 1.02 (0.91-1.15)        | 0.731   | 1.00 (0.86-1.17)           | 0.972   | 0.98 (0.82-1.16)                 | 0.801   | 1.01 (0.87-1.16) | 0.931   |
| Symptoms, signs and abnormal clinical etc                          | <b>1.98 (1.18-3.34)</b> | 0.010   | 0.91 (0.76-1.09)        | 0.306   | 1.04 (0.94-1.14)           | 0.494   | 0.94 (0.84-1.04)                 | 0.206   | 1.02 (0.87-1.20) | 0.801   |
| Injury, poisoning, consequences of external causes                 | 1.56 (0.93-2.64)        | 0.094   | 1.01 (0.90-1.13)        | 0.924   | 1.04 (0.93-1.16)           | 0.454   | 1.05 (0.94-1.16)                 | 0.398   | 1.06 (0.93-1.21) | 0.381   |
| Factors influencing health status and contact with health services | 1.56 (0.98-2.48)        | 0.063   | 1.02 (0.93-1.12)        | 0.706   | 1.03 (0.96-1.10)           | 0.474   | 1.00 (0.93-1.08)                 | 0.978   | 1.05 (0.95-1.16) | 0.344   |

Statistically significant results are marked with bold types

Only previous comorbidities affecting &gt;100 patients are shown

\*Adjusted for gender, age, dead in post period, duration of ETA before index date, stopped SB4 treatment within 180 days and comorbidities (WHO chapters) 12-24 months before index date
